# Supplementary material for: Revealing the unfavorable role of superfluous CH3NH3PbI3 grain boundary traps in perovskite solar cells on carrier collection
Source: Royal Society of Chemistry journal article supplement (doi:10.1039/c6ra15512j), 2016-01-01
Supplement: c6ra15512j1.pdf [file c6ra15512j1.pdf]

## Supporting information

### Revealing the Unfavorable Role of Superfluous $\text{CH}_3\text{NH}_3\text{PbI}_3$ Grain

#### Boundary Traps in Perovskite Solar Cells on Carriers Collection

Yangyang Du, Hongkun Cai \*, Hongbin Wen, Yuxiang Wu, Zhenglong, Li, Jian Xu, Like Huang, Jian Ni, Juan Li, Jianjun Zhang

*College of Electronic Information and Optical Engineering, Nankai University, Key Laboratory of Opto-electronic Information Science and Technology for Ministry of Education, Tianjin, 300071, China*

\* To whom correspondence should be addressed: [caihongkun@nankai.edu.cn](mailto:caihongkun@nankai.edu.cn), [jjzhang@nankai.edu.cn](mailto:jjzhang@nankai.edu.cn).

Tel: +8602223508046

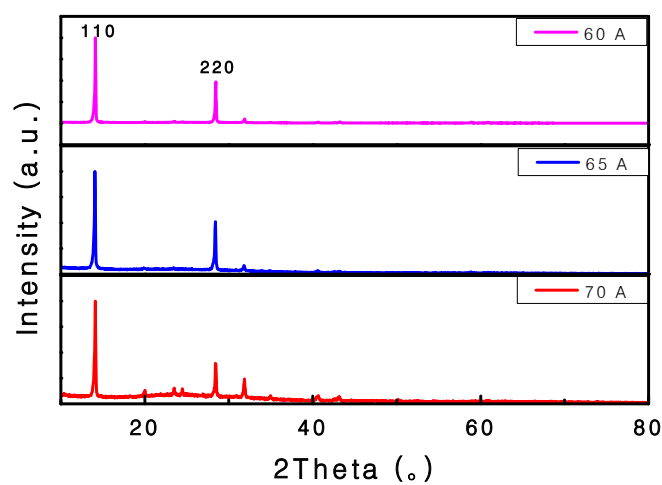

**Fig. S1**  $\text{CH}_3\text{NH}_3\text{PbI}_3$  films XRD evolution pattern as the function of evaporation current.

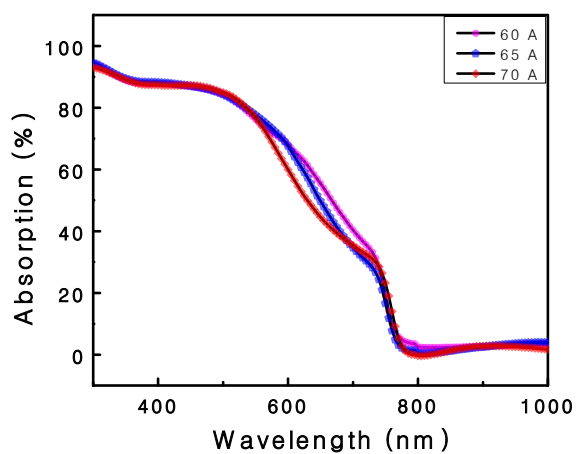

**Fig. S2**  $\text{CH}_3\text{NH}_3\text{PbI}_3$  absorption spectrum prepared by STELV with different evaporation current.

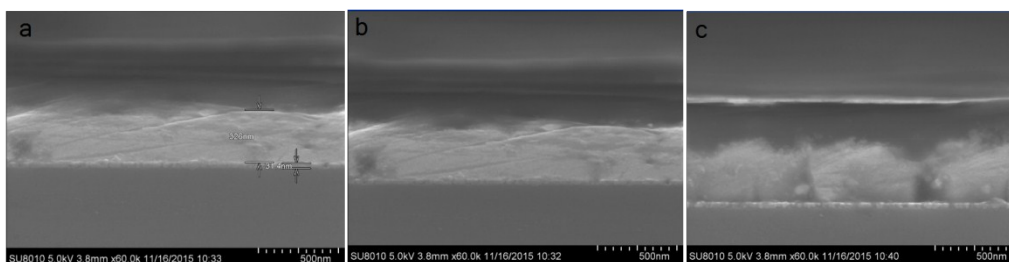

**Fig. S3** Cross section SEM image of  $\text{CH}_3\text{NH}_3\text{PbI}_3$  films prepared by the STELV procedure with different value of evaporation current keeping identical thickness, which can be obtained with the same amount of  $\text{PbI}_2$  power. (a) 70 A; (b) 65 A; (c) 60 A.

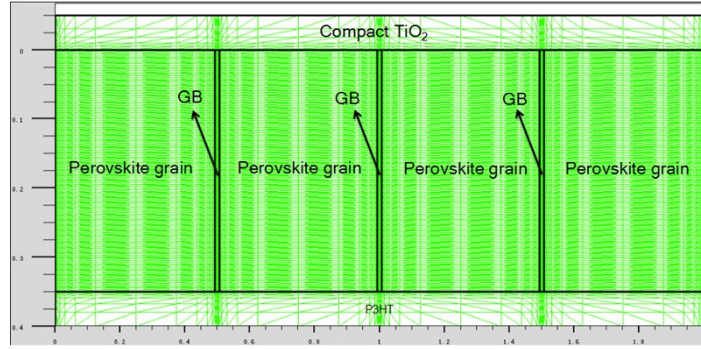

**Fig. S4** The mesh diagram for cross section PSCs covered the physical simulation domain.

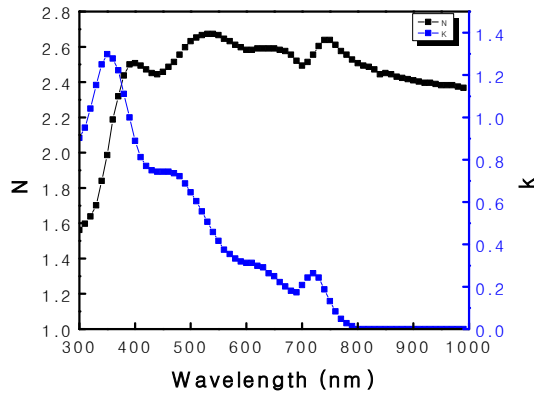

**Fig. S5** Refractive index (n) and extinction coefficient (k) spectra of CH<sub>3</sub>NH<sub>3</sub>PbI<sub>3</sub> film for simulation.

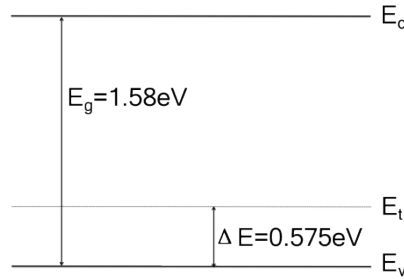

**Fig. S6** The specification of PGB trap energy level diagram.

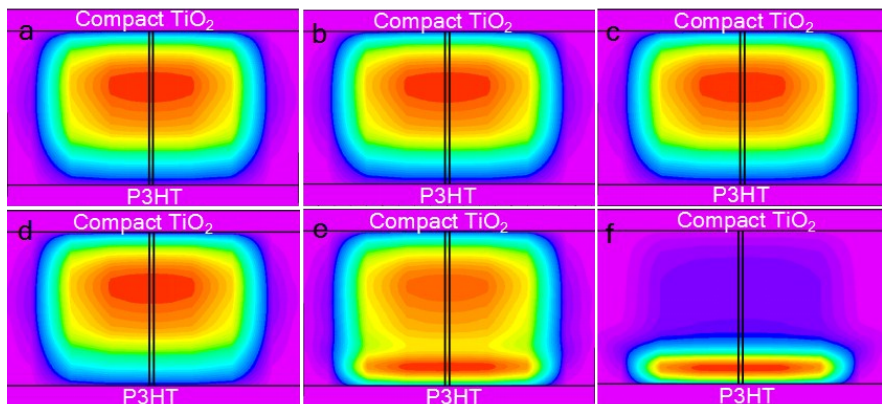

**Fig. S7** Recombination rate distribution within PSCs in light illumination versus different bulk defects density. (a) without any defects; (b)  $1e11 \text{ cm}^{-3}$ ; (c)  $1e12 \text{ cm}^{-3}$ ; (d)  $1e13 \text{ cm}^{-3}$ ; (e)  $1e14 \text{ cm}^{-3}$ ; (f)  $1e15 \text{ cm}^{-3}$ .

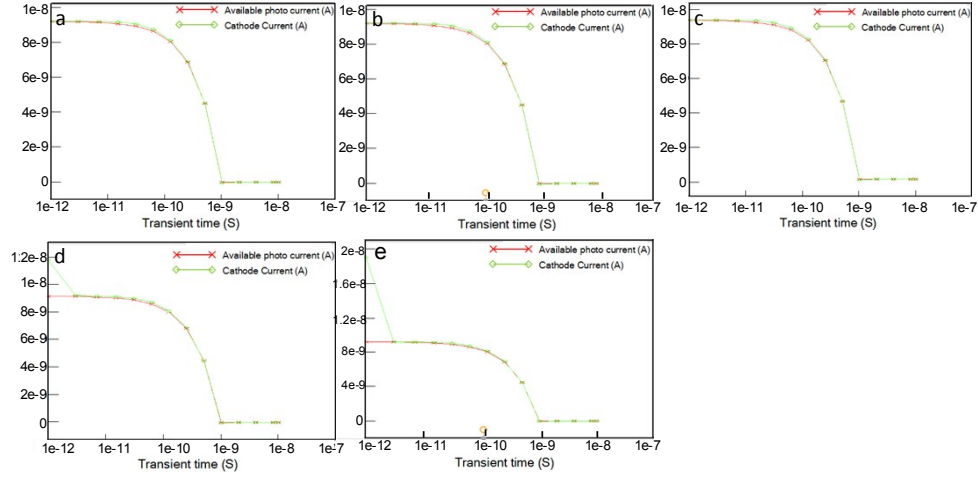

**Fig. S8** Transient photo current collection efficiency versus the amount of bulk traps density. (a)  $1e11 \text{ cm}^{-3}$ ; (b)  $1e12 \text{ cm}^{-3}$ ; (c)  $1e13 \text{ cm}^{-3}$ ; (d)  $1e14 \text{ cm}^{-3}$ ; (e)  $1e15 \text{ cm}^{-3}$ ;

**Table S1.** Parameter set for the simulation of PSCs

| Parameter and units                                                  | TiO <sub>2</sub>                                  | Perovskite       | P3HT     |
|----------------------------------------------------------------------|---------------------------------------------------|------------------|----------|
| Thickness (nm)                                                       | 50                                                | 350              | 50       |
| Band gap (eV)                                                        | 3.2                                               | 1.58             | 3.02     |
| Electron affinity (eV)                                               | 4.0                                               | 3.75             | 2.18     |
| Permittivity (F/cm)                                                  | 46                                                | 70               | 3.4      |
| Effective conduction band density (cm <sup>-3</sup> )                | -                                                 | $1e21$           | $2.5e19$ |
| Effective valence band density (cm <sup>-3</sup> )                   | -                                                 | $1e21$           | $2.5e19$ |
| Electron mobility (cm <sup>2</sup> v <sup>-1</sup> s <sup>-1</sup> ) | 1                                                 | 20               | -        |
| Hole mobility (cm <sup>2</sup> v <sup>-1</sup> s <sup>-1</sup> )     | 0.13                                              | 20               | 0.001    |
| Electron Lifetime (mS)                                               | 20                                                | 100              | -        |
| Hole Lifetime (mS)                                                   | 2.3                                               | 100              | -        |
| Doping concentration of acceptors (cm <sup>-3</sup> )                | -                                                 | -                | $2e17$   |
| Doping concentration of donors (cm <sup>-3</sup> )                   | $2e16$                                            | -                | -        |
| Band tail density of states (cm <sup>-3</sup> eV <sup>-1</sup> )     | -                                                 | $1e11$ to $1e15$ | -        |
| Characteristic energy donors, acceptors                              | -                                                 | 1,1              | -        |
| Capture cross section for donor states, e,h (cm <sup>2</sup> )       | -                                                 | $1e-8$           | -        |
| Capture cross section for acceptors, e,h (cm <sup>2</sup> )          | -                                                 | $1e-8$           | -        |
| Total Gaussian density of states N <sub>DB</sub> (cm <sup>-3</sup> ) | -                                                 | $1e14$           | -        |
| Gaussian peak energy donors, acceptors                               | -                                                 | 0.575            | -        |
| Characteristic decay energy of donors, acceptors                     | -                                                 | 0.1, 1           | -        |
| Physical models                                                      | Phonon transition (SRH); Photon transition (OPTR) |                  |          |
